# Supplementary material
Source: publisher figshare collection journal article supplement (https://frontiersin.figshare.com/ndownloader/files/26479178)
Supplement: Supplementary file 1 [file 26479178]

Class	Df	SumsOfSqs	MeanSqs	F.Model	R2	Pr..F.	Metric
CollectionMonth	1	3.94500985760846	3.94500985760846	12.1982241032126	0.0591511949578097	0.001	Dice-Sorensen
Site	1	1.91359998483266	1.91359998483266	5.9169741778652	0.0286923809723297	0.001	Dice-Sorensen
CollectionMonth:Site	1	1.00447302522793	1.00447302522793	3.10589517127089	0.0150609965221068	0.001	Dice-Sorensen
Residuals	185	59.8305800485625	0.323408540803041	NA	0.897095427547754	NA	Dice-Sorensen
Total	188	66.6936629162316	NA	NA	1	NA	Dice-Sorensen
CollectionMonth	1	2.05944963608651	2.05944963608651	5.13393891285699	0.026061941807089	0.001	Bray-Curtis
Site	1	1.6763328783196	1.6763328783196	4.1788788830304	0.0212136724096322	0.001	Bray-Curtis
CollectionMonth:Site	1	1.07388978549911	1.07388978549911	2.67706695094044	0.0135898701315604	0.001	Bray-Curtis
Residuals	185	74.2116704431106	0.401144164557355	NA	0.939134515651719	NA	Bray-Curtis
Total	188	79.0213427430159	NA	NA	1	NA	Bray-Curtis
CollectionMonth	1	2.75685505993161	2.75685505993161	10.6942039504072	0.0527874135517923	0.001	Unifrac Unweighted
Site	1	1.12591512350816	1.12591512350816	4.36757308595789	0.0215586768099143	0.001	Unifrac Unweighted
CollectionMonth:Site	1	0.651758685594913	0.651758685594913	2.52825780052949	0.0124796750371507	0.001	Unifrac Unweighted
Residuals	185	47.6910846709568	0.257789646870037	NA	0.913174234601143	NA	Unifrac Unweighted
Total	188	52.2256135399915	NA	NA	1	NA	Unifrac Unweighted
CollectionMonth	1	2.75685505993161	2.75685505993161	10.6942039504072	0.0527874135517923	0.001	Unifrac Weighted
Site	1	1.12591512350816	1.12591512350816	4.36757308595789	0.0215586768099143	0.001	Unifrac Weighted
CollectionMonth:Site	1	0.651758685594913	0.651758685594913	2.52825780052949	0.0124796750371507	0.001	Unifrac Weighted
Residuals	185	47.6910846709568	0.257789646870037	NA	0.913174234601143	NA	Unifrac Weighted
Total	188	52.2256135399915	NA	NA	1	NA	Unifrac Weighted
